# Supplementary material for: Change in grip strength in trans people and its association with lean body mass and bone density
Source: PubMed Central journal article supplement — Endocr Connect. 2019 Jun 26;8(7):1020–8. doi: 10.1530/EC-19-0196 (PMC6652261; doi:10.1530/ec-19-0196), 2019-06-26
Supplement: supplementary_table_1.pdf [file supplementary_table_1.pdf]

**Supplementary Table 1.** Differences in characteristics between included and excluded transwomen and transmen

|                                 | Transwomen         |                       | p     | Transmen           |                       | p     |
|---------------------------------|--------------------|-----------------------|-------|--------------------|-----------------------|-------|
|                                 | Included (n=249)   | Excluded (n=247)      |       | Included (n=278)   | Excluded (n=243)      |       |
| Age, yr                         | 28.5 (23.0 – 40.2) | 28.0 (22.4 – 44.0)    | 0.977 | 23.0 (20.3 – 30.2) | 22.2 (20.1 – 26.6)    | 0.084 |
| BMI, kg/m <sup>2</sup>          | 23.8 (4.4)         | 23.5 (4.4)            | 0.478 | 25.3 (5.5)         | 25.3 (5.8)            | 0.945 |
| Smoking,<br>%yes                | 24.7               | 27.4                  | 0.513 | 29.9               | 35.0                  | 0.274 |
| Alcohol, %yes                   | 44.8               | 50.0                  | 0.246 | 55.3               | 55.1                  | 0.967 |
| Baseline grip<br>strength, kg   | 41.8 (8.9)         | 43.2 (9.1)<br>(n=218) | 0.084 | 33.1 (6.5)         | 34.0 (6.6)<br>(n=215) | 0.144 |
| <b>Estradiol,<br/>pmol/L</b>    |                    |                       |       |                    |                       |       |
| - Amsterdam                     | 105 (83 – 131)     | 96 (73 – 155)         | 0.907 | 142 (59 – 371)     | 397 (206 – 697)       | 0.053 |
| - Ghent                         | 109 (88 – 130)     | 93 (88 – 116)         | 0.468 | 166 (116 – 431)    | 128 (92 – 437)        | 0.721 |
| - Oslo                          | 120 (100 – 140)    | 100 (90 – 130)        | 0.307 | 280 (180 – 480)    | 275 (150 – 510)       | 0.810 |
| <b>Testosterone,<br/>nmol/L</b> |                    |                       |       |                    |                       |       |
| - Amsterdam                     | 18.5 (15.0 – 23.0) | 17.5 (15.0 – 22.5)    | 0.928 | 1.3 (1.0 – 1.7)    | 1.3 (0.5 – 1.7)       | 0.876 |
| - Ghent                         | 17.9 (13.5 – 21.5) | 19.3 (13.2 – 23.6)    | 0.822 | 1.0 (0.7 – 1.3)    | 0.9 (0.7 – 1.3)       | 0.892 |
| - Oslo                          | 18.1 (12.2 – 20.4) | 15.4 (11.6 – 20.1)    | 0.535 | 1.0 (0.8 – 1.3)    | 1.3 (0.8 – 1.6)       | 0.107 |
| Creatinine                      | 78.5 (10.8)        | 77.0 (10.8)           | 0.266 | 66.0 (9.0)         | 65.0 (10.0)           | 0.363 |

Data are presented as median with inter quartile range, mean with standard deviation, or percentages.
